# Supplementary material for: Bismuth nanoparticles embedded in carbon fibers as flexible and free-standing anodes for efficient sodium ion batteries
Source: PubMed Central journal article supplement — RSC Adv. 2024 Dec 19;14(54):39921–6. doi: 10.1039/d4ra07887j (PMC11656448; doi:10.1039/d4ra07887j), 2024-12-19
Supplement: RA-014-D4RA07887J-s001.pdf [file RA-014-D4RA07887J-s001.pdf]

Supporting Information for

**Bismuth Nanoparticles Embedded in Carbon Fibers as Flexible and Free-standing Anodes for Efficient Sodium Ion Batteries**

*Yang Cao,<sup>a</sup> Shiwei Wei,<sup>\*b</sup> Huifang Zhang,<sup>b</sup> Yong Yan<sup>b</sup>, Zhiling Peng<sup>b</sup>, Heming Zhao,<sup>\*b</sup>*

<sup>a</sup> School of Materials Science and Engineering, North University of China, Taiyuan, 030051, China.

<sup>b</sup> Shanxi Key Laboratory of High-end Equipment Reliability Technology, School of Mechanical and Electrical Engineering, North University of China, Taiyuan, 030051, China.

---

\*Corresponding author. *Email addresses:* [wei\\_swe@163.com](mailto:wei_swe@163.com); [20230230@nuc.edu.cn](mailto:20230230@nuc.edu.cn); (S. Wei)

\*Corresponding author. *Email addresses:* [zhm@nuc.edu.cn](mailto:zhm@nuc.edu.cn); (H. Zhao)

### **The calculation process of the thermo-gravimetric analysis curves:**

The oxidation reaction occurs during the TGA test and the reaction equation can be described as follows:

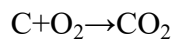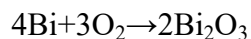

According to the above reaction equation, it is generally considered that all carbon will burn off at high temperature (nitrogen will also disappear together). Therefore, the final product is  $\text{Bi}_2\text{O}_3$ . The weight percentage of  $\text{Bi}_2\text{O}_3$  is determined to about 44.6% from the TGA curves.

In general, the molar masses of Bi and  $\text{Bi}_2\text{O}_3$  are  $209 \text{ g mol}^{-1}$  and  $466 \text{ g mol}^{-1}$ , respectively. In order to calculate the weight percentage of Bi in the composite, we can presume that the weight percentage of Bi is  $x$ . When we calculate the value back to the content of Bi,  $4 \times 209 \times 55.4\% = 2 \times 466 \times x$ , therefore,  $x = 49.7\%$ . That is to say, the weight percentage of Bi in the Bi/CF electrode is estimated to be 49.7%.

**Table S1.** Elemental analysis results of the samples from XPS measurements.

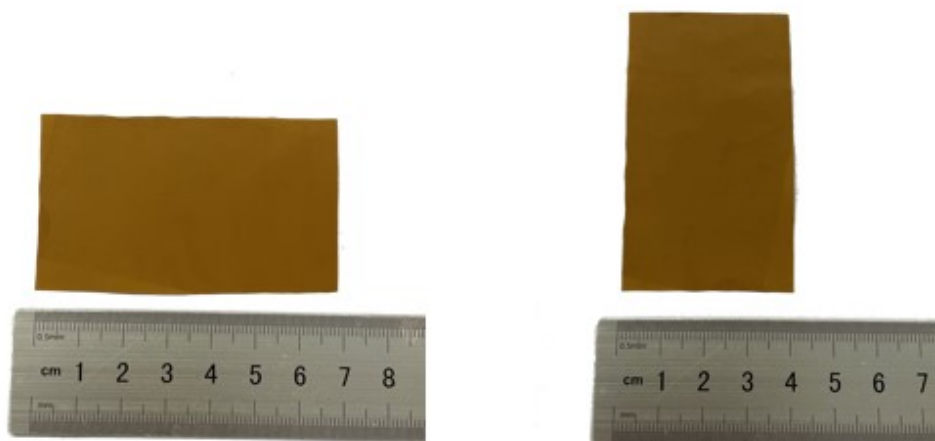

**Figure S1.** Digital photo of Bi/CF films after pre-oxidation.

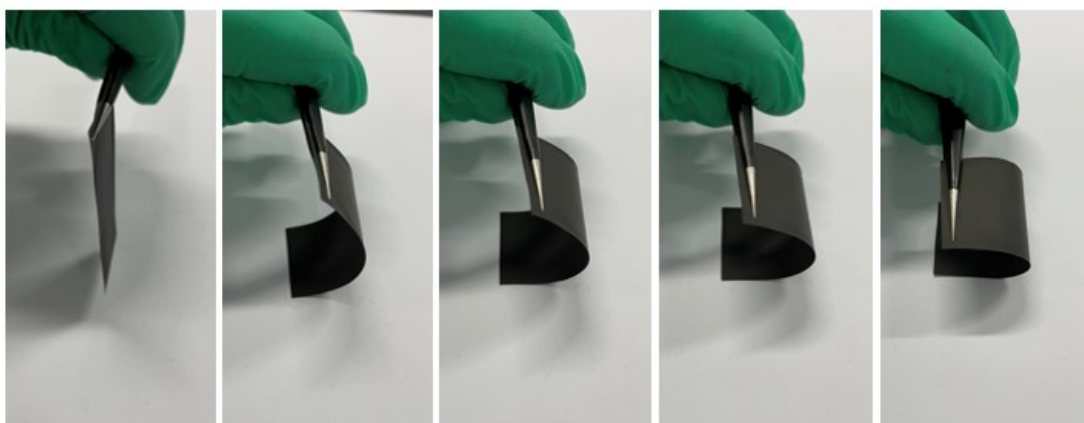

**Figure S2.** Flexibility test of Bi/CF films.

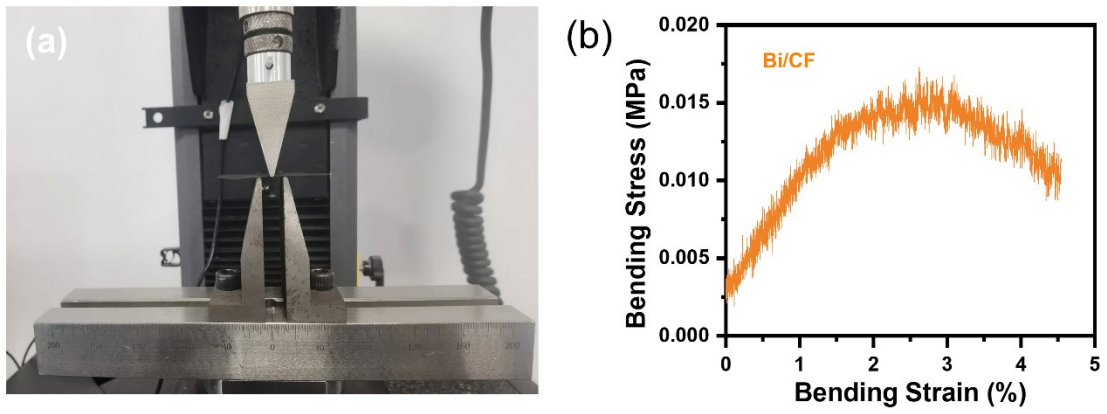

**Figure S3.** (a) Electronic universal testing machine. (b) Bending strain—stress curve of Bi/CF.

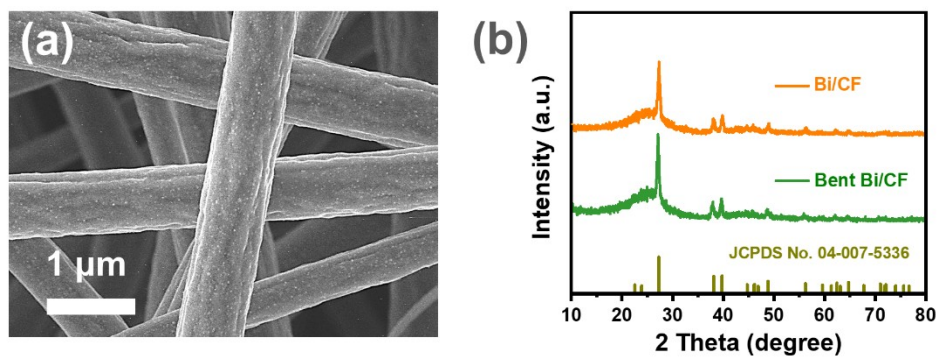

**Figure S4.** (a) SEM image and (b) XRD of bent Bi/CF electrode.

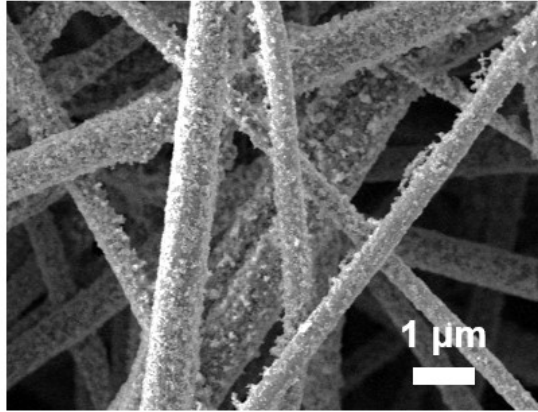

**Figure S5.** SEM image of Bi/CF electrode after 2000 cycles.

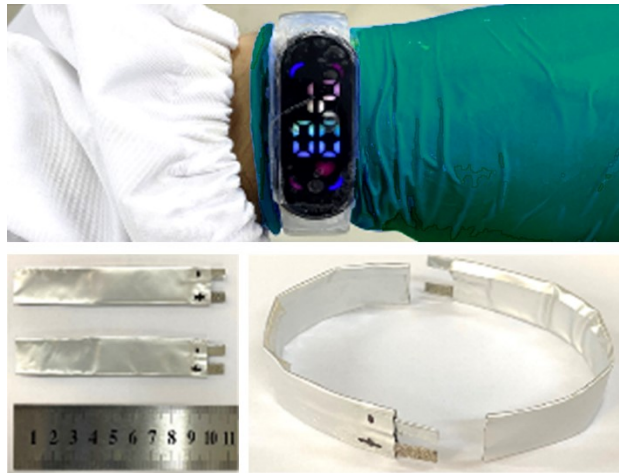

**Figure S6.** The flexible SIBs device and the corresponding two SIBs power a smart bracelet.



**Table S1.** The comparison of rate capability of Bi-based anode for sodium-ion batteries. (S: specific capacity, C: current density)

| Sample                   | Method                                                       | Rate capability                               |                  | Ref.             |
|--------------------------|--------------------------------------------------------------|-----------------------------------------------|------------------|------------------|
|                          |                                                              | S/C (mAh·g <sup>-1</sup> /A·g <sup>-1</sup> ) |                  |                  |
| Bi-C/CF                  | Calcination                                                  | 550/0.1                                       | 423/0.2          | [1]              |
|                          |                                                              | 338/0.4                                       | 283/0.8          |                  |
|                          |                                                              | 227/1.6                                       | 110/2.4          |                  |
| Bi@C composite           | Annealing                                                    | 365.2/0.4                                     | 302.8/0.8        | [2]              |
|                          |                                                              | 290.5/2.0                                     | 290.0/4.0        |                  |
|                          |                                                              | 281.5/8.0                                     |                  |                  |
| Nano Bi@carbon nanofiber | Electrospinning                                              | 302.27/0.1                                    | 271.11/0.4       | [3]              |
|                          |                                                              | 194.33/0.8                                    | 112.15/1.6       |                  |
|                          |                                                              | 69.04/3.2                                     |                  |                  |
| 3D porous Bi@3DGFs       | Hydrothermal                                                 | 225/0.2                                       | 220/0.5          | [4]              |
|                          |                                                              | 216/1.0                                       | 213/2.0          |                  |
|                          |                                                              | 208/5.0                                       |                  |                  |
| Porous Bi/N-C            | Solution combustion synthesis at 180 °C with several minutes | 379/0.05                                      | 376/0.1          | [5]              |
|                          |                                                              | 301.8/2.0                                     | 157.6/10.0       |                  |
| Bi@C microsphere         | Aerosol spray pyrolysis                                      | 409/0.2                                       | 388/0.4          | [6]              |
|                          |                                                              | 365/0.5                                       | 331/1.0          |                  |
|                          |                                                              | 83.4/2.0                                      |                  |                  |
| <b>Bi@CF</b>             | Electrospinning / Calcination                                | <b>384.8/0.1</b>                              | <b>376.1/0.2</b> | <b>This work</b> |
|                          |                                                              | <b>362.4/0.5</b>                              | <b>354.8/1.0</b> |                  |
|                          |                                                              | <b>351.9/2.0</b>                              | <b>349.3/5.0</b> |                  |
|                          |                                                              | <b>341.5/10.0</b>                             |                  |                  |

**Table S2.** The four probe conductivities of the pure Bi and Bi/CF electrodes.

| <b>Samples</b> | <b>Pressure (MPa)</b> | <b>Height (mm)</b> | <b>Seismic density</b> | <b>Resistivity (<math>\Omega</math>-cm)</b> | <b>Conductivity (S/cm)</b> |
|----------------|-----------------------|--------------------|------------------------|---------------------------------------------|----------------------------|
| Bi             | 5                     | 1.68               | 59.523                 | 0.35759                                     | 2.7964                     |
|                | 10                    | 1.51               | 66.225                 | 0.24009                                     | 4.1651                     |
|                | 15                    | 1.4                | 71.428                 | 0.18562                                     | 5.3872                     |
|                | 20                    | 1.34               | 74.626                 | 0.1557                                      | 6.4223                     |
|                | 25                    | 1.29               | 77.519                 | 0.13501                                     | 7.4065                     |
|                | 30                    | 1.25               | 80                     | 0.12074                                     | 8.2816                     |
| Bi/CF          | 5                     | 2.54               | 39.37                  | 0.24465                                     | 4.0873                     |
|                | 10                    | 2.22               | 45.045                 | 0.16293                                     | 6.1375                     |
|                | 15                    | 2.05               | 48.78                  | 0.128                                       | 7.812                      |
|                | 20                    | 1.95               | 51.282                 | 0.10773                                     | 9.2823                     |
|                | 25                    | 1.88               | 53.191                 | 0.093704                                    | 10.671                     |
|                | 30                    | 1.81               | 55.248                 | 0.083439                                    | 11.984                     |

- [1] Y. Zhang, Q. Su, W. Xu, G. Cao, Y. Wang, A. Pan, S. Liang, A Confined Replacement Synthesis of Bismuth Nanodots in MOF Derived Carbon Arrays as Binder-Free Anodes for Sodium-Ion Batteries, *Adv Sci (Weinh)* 6(16) (2019) 1900162.
- [2] P. Xiong, P. Bai, A. Li, B. Li, M. Cheng, Y. Chen, S. Huang, Q. Jiang, X.H. Bu, Y. Xu, Bismuth Nanoparticle@Carbon Composite Anodes for Ultralong Cycle Life and High-Rate Sodium-Ion Batteries, *Adv Mater* 31(48) (2019) 1904771.
- [3] H. Yin, Q. Li, M. Cao, W. Zhang, H. Zhao, C. Li, K. Huo, M. Zhu, Nanosized-bismuth-embedded 1D carbon nanofibers as high-performance anodes for lithium-ion and sodium-ion batteries, *Nano Res* 10(6) (2017) 2156-2167.
- [4] X. Cheng, D. Li, Y. Wu, R. Xu, Y. Yu, Bismuth nanospheres embedded in three-dimensional (3D) porous graphene frameworks as high performance anodes for sodium- and potassium-ion batteries, *J Mater Chem A* 7(9) (2019) 4913-4921.
- [5] L. Wang, A.A. Voskanyan, K.Y. Chan, B. Qin, F. Li, Combustion Synthesized Porous Bismuth/N-Doped Carbon Nanocomposite for Reversible Sodiation in a Sodium-Ion Battery, *Acs Appl Energ Mater* 3(1) (2019) 565-572.
- [6] F. Yang, F. Yu, Z. Zhang, K. Zhang, Y. Lai, J. Li, Bismuth Nanoparticles Embedded in Carbon Spheres as Anode Materials for Sodium/Lithium-Ion Batteries, *Chemistry* 22(7) (2016) 2333-8.
